# Supplementary material for: Efficacy and Safety of Ixekizumab Through 5 Years in Moderate-to-Severe Psoriasis: Long-Term Results from the UNCOVER-1 and UNCOVER-2 Phase-3 Randomized Controlled Trials
Source: Springer Nature journal article supplement (doi:10.1007/s13555-020-00367-x), 2020-03-21
Supplement: MOESM1 [file 17820814]

## Supplemental Material

**Title:** Efficacy and safety of ixekizumab through 5 years in moderate-to-severe psoriasis: Long-term results from the UNCOVER-1 and UNCOVER-2 Phase 3 randomized controlled trials

**Running Heading (short version of the title):** 5-year efficacy and safety of ixekizumab in psoriasis

**Authors:** Craig Leonardi<sup>1</sup>, Kristian Reich<sup>2,3</sup>, Peter Foley<sup>4</sup>, Hideshi Torii<sup>5</sup>, Sascha Gerdes<sup>6</sup>, Lyn Guenther<sup>7</sup>, Melinda Gooderham<sup>8</sup>, Laura K. Ferris<sup>9</sup>, Christopher E.M. Griffiths<sup>10</sup>, Hany ElMaraghy<sup>11</sup>, Heidi Crane<sup>11</sup>, Himanshu Patel<sup>11</sup>, Russel Burge<sup>11</sup>, Gaia Gallo<sup>11</sup>, David Shrom<sup>11</sup>, Ann Leung<sup>12</sup>, Chen-Yen Lin<sup>11</sup>, Kim Papp<sup>13</sup>

**Author Affiliations:** <sup>1</sup>Central Dermatology, St. Louis, MO, USA

<sup>2</sup>Center for Translational Research in Inflammatory Skin Diseases, Institute for Health Services Research in Dermatology and Nursing, University Medical Center Hamburg-Eppendorf, Germany, <https://orcid.org/0000-0001-5248-4332>

<sup>3</sup>Skinflammation<sup>®</sup> Center, Hamburg, Germany

<sup>4</sup>The University of Melbourne, St. Vincent's Hospital Melbourne and Probity Medical Research, Skin Health Institute, Melbourne, Victoria, Australia, <https://orcid.org/0000-0001-5891-5607>

<sup>5</sup>Division of Dermatology, Tokyo Yamate Medical Center, Tokyo, Japan

<sup>6</sup>Psoriasis-Center at the Department of Dermatology, University Medical Center Schleswig-Holstein, Campus Kiel, Kiel, Germany

<sup>7</sup>Guenther Dermatology Research Centre, London, ON, Canada, <https://orcid.org/0000-0001-9286-1534>

<sup>8</sup>SkiN Centre for Dermatology and Probity Medical Research, Peterborough, ON, Canada, <https://orcid.org/0000-0001-8926-0113>

<sup>9</sup>University of Pittsburgh Medical Center, Pittsburgh, PA, USA, <https://orcid.org/0000-0003-3000-2165>

<sup>10</sup>Dermatology Centre, Salford Royal Hospital, University of Manchester, Manchester, UK

<sup>11</sup>Eli Lilly and Company, Lilly Corporate Center, Indianapolis, IN, USA

<sup>12</sup>Syneos Health, Morrisville, NC, USA

<sup>13</sup>K. Papp Clinical Research and Probity Medical Research Inc., Waterloo, ON, Canada, <https://orcid.org/0000-0001-9557-3642>

**Corresponding Author:** David Shrom, Eli Lilly and Company, Lilly Corporate Center, Indianapolis, IN 46285; email: [shrom\\_david\\_stanley@lilly.com](mailto:shrom_david_stanley@lilly.com); Phone: 317-655-0310

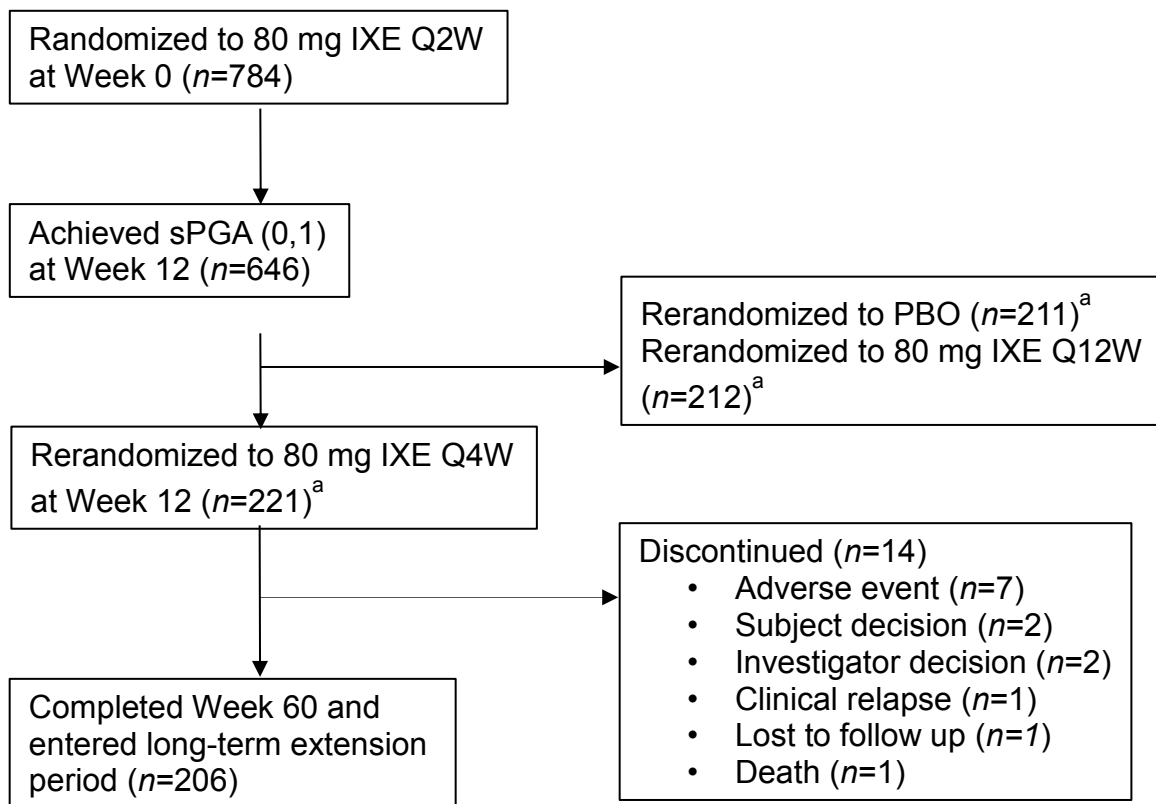

**Supplemental Fig. 1** Disposition of patients: approved dosing regimen patient population

*IXE Q2W* ixekizumab every 2 weeks, *IXE Q4W* ixekizumab every 4 weeks, *IXE Q12W* ixekizumab every 12 weeks, *n* number of patients in the specified category, *PBO* placebo, *sPGA (0,1)* static Physician's Global Assessment score of 0 or 1

<sup>a</sup>Of the 646 patients who achieved sPGA (0,1) at Week 12, 6 discontinued at Week 12 before entering the maintenance dosing period (3 due to adverse events, 2 due to patient decision, 1 due to investigator decision). A total of 644 patients rerandomized into the maintenance dosing period; 4 patients who did not achieve sPGA (0,1) at Week 12 rerandomized at Week 12 due to randomization errors.

An additional patient in the IXE Q4W group was considered to not have entered the long-term extension period. This patient attended the Week 60 visit but was then lost to follow up and did not provide the study treatment exposure record to prove the subject had taken study treatment in the long-term extension period.

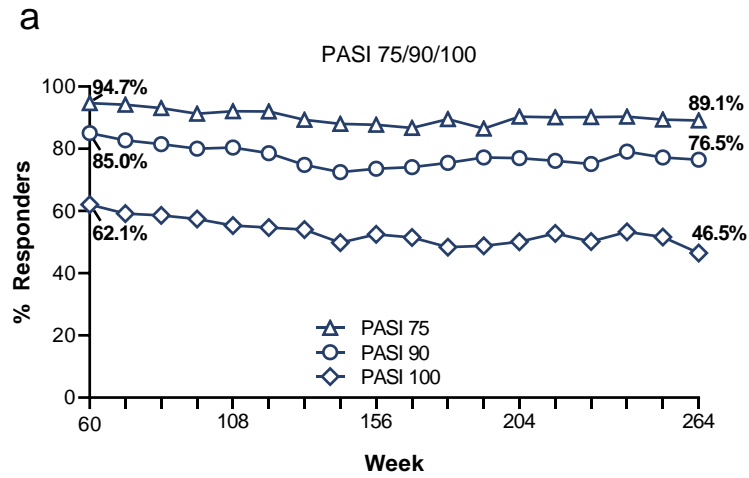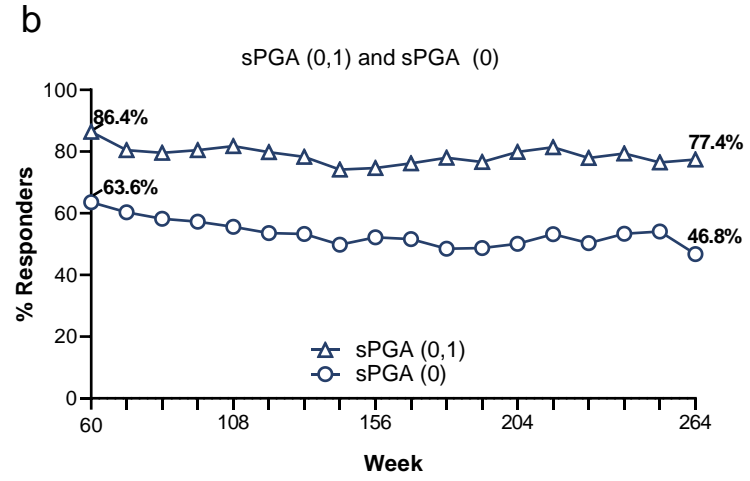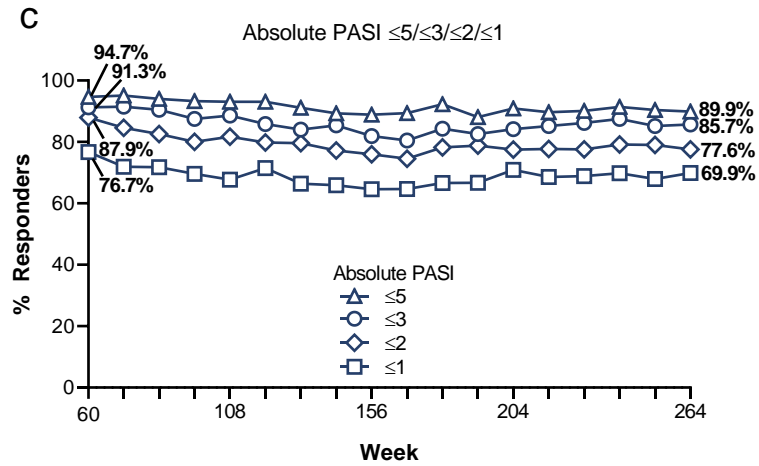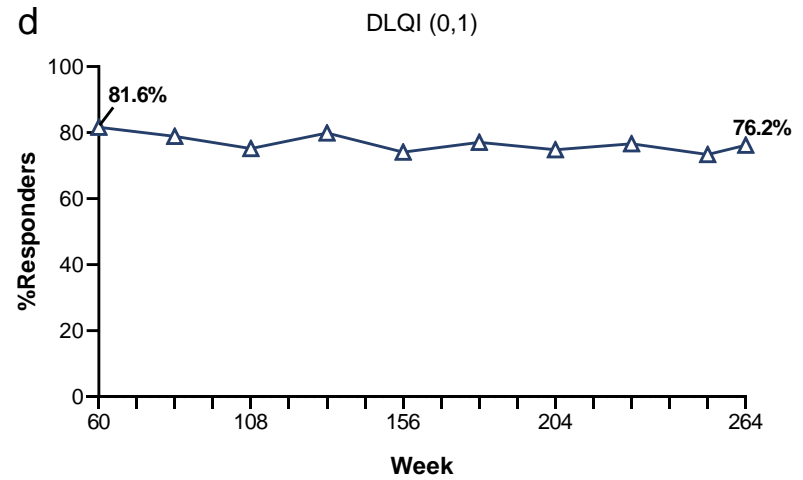

**Supplemental Fig. 2** Treatment effects on response rates (modified nonresponder imputation analysis) for efficacy outcomes including both 80 mg ixekizumab every-4-week and every-2-week escalation visit: a. Psoriasis and Severity Index (PASI) 75/90/100; b. static Physician's Global Assessment (sPGA) 0 or 1 and sPGA 0; c. absolute PASI  $\leq 5/\leq 3/\leq 2/\leq 1$ ; d. Dermatology Life Quality Index (DLQI) scores of 0 or 1 for efficacy outcomes through 5 years of treatment. Data

include patients who escalated to every-2-week dosing during the long-term extension period. Percentages listed on the graphs are the percentage of patients achieving response at Week 60 and Week 264. Each consecutive tick mark after Week 60 on the x-axis represents 12 weeks.

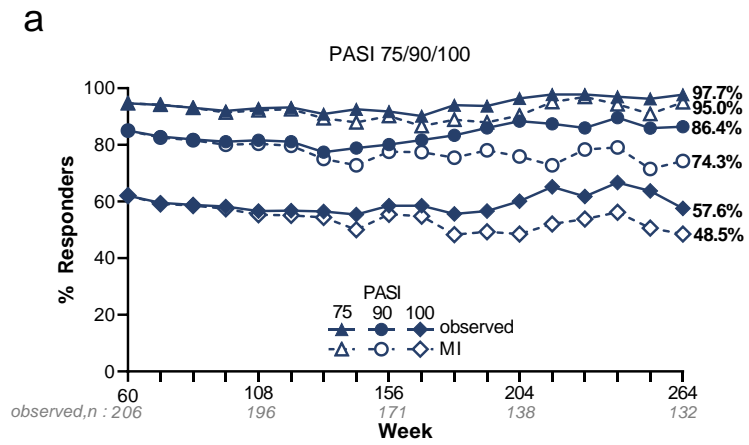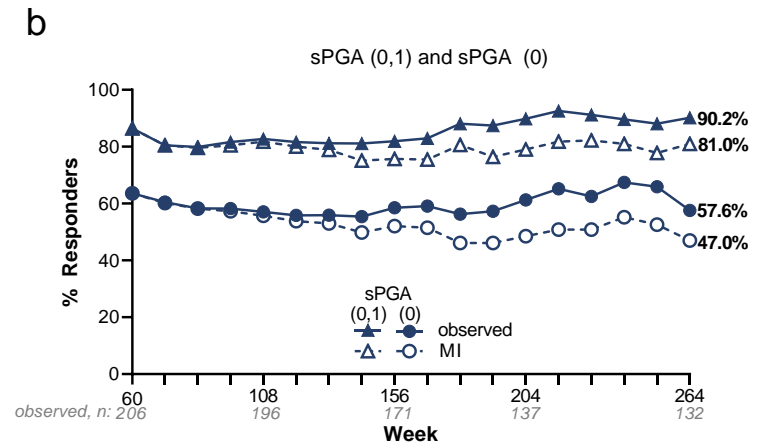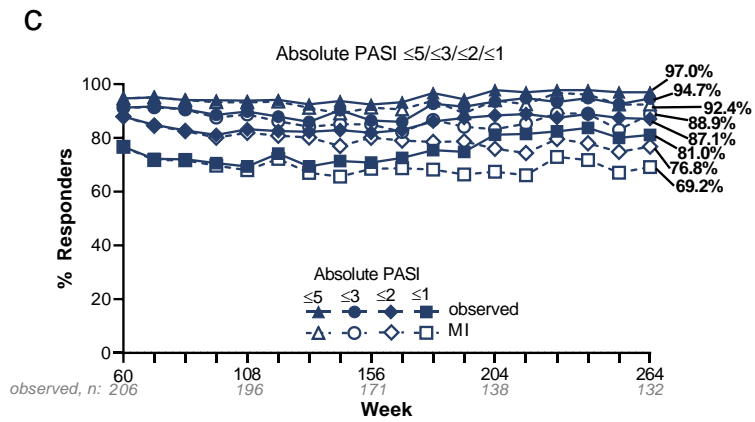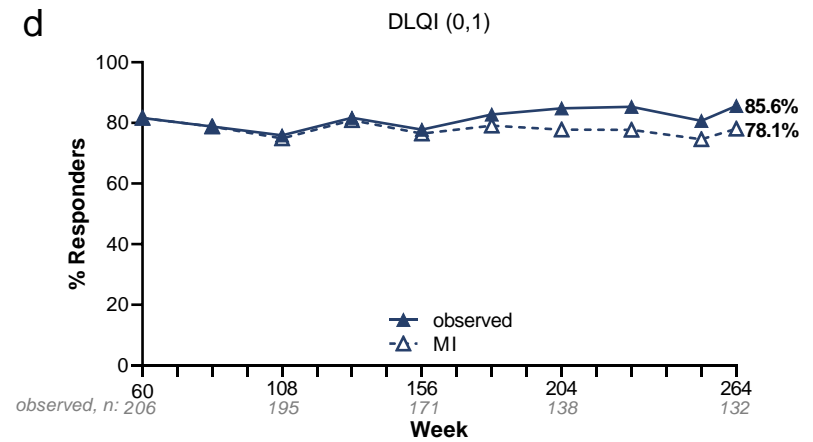

**Supplemental Fig. 3** Observed case and multiple imputation (MI) analyses: response rates in patients receiving 80 mg ixekizumab every 4 weeks achieving a. Psoriasis and Severity Index (PASI) 75/90/100; b. static Physician's Global Assessment (sPGA) 0 or 1 and sPGA 0; c. absolute PASI  $\leq 5/\leq 3/\leq 2/\leq 1$ ; and d. Dermatology Life Quality Index (DLQI) scores of 0 or 1 for efficacy outcomes through 5 years of treatment. Data include patients who escalated to every-2-week dosing during the long-term extension period. Percentages listed on the graph in panels a, b, and d are the percentages of patients achieving response at Week 264. Each consecutive tick mark after Week 60 on the x-axis represents 12 weeks.

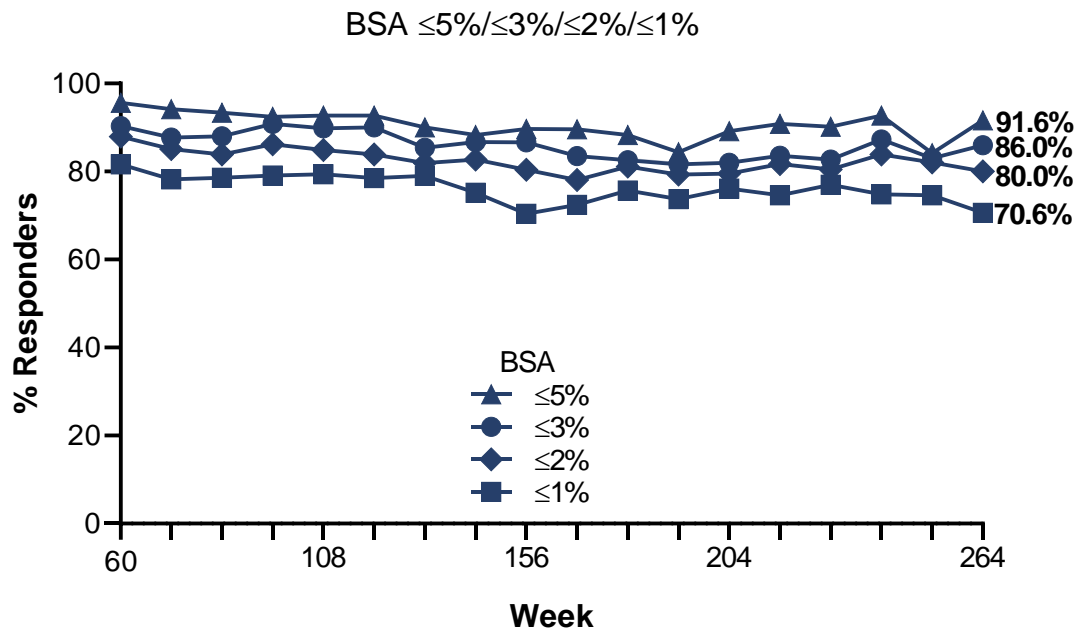

**Supplemental Fig. 4** Response rates (modified nonresponder imputation) of patients receiving 80 mg ixekizumab every 4 weeks with body surface area (BSA) involvement  $\leq 5\%$ / $\leq 3\%$ / $\leq 2\%$ / $\leq 1\%$  through 5 years of treatment. Data exclude patients who escalated to every-2-week dosing during the long-term extension period. Percentages listed on the graph are the percentages of patients achieving response at Week 264. Each consecutive tick mark after Week 60 on the x-axis represents 12 weeks.

**Supplemental Table S1** Treatment response at visit prior to every-2-week (Q2W) dose escalation in patients who escalated to IXE Q2W dosing

| <b>Parameter</b>                                             | <b>IXE Q2W/IXE Q4W</b>   |
|--------------------------------------------------------------|--------------------------|
|                                                              | <b>80 mg<br/>N = 206</b> |
| IXE Q2W escalators/ approved dose regimen patient population | 43/206 (20.9%)           |
| PASI                                                         | N = 43                   |
| Mean (SD)                                                    | 7.3 (9.1)                |
| Percent improvement, mean (SD)                               | 66.7 (28.9)              |
| PASI 50, n (%)                                               | 35 (81.4)                |
| PASI 75, n (%)                                               | 20 (46.5)                |
| PASI 90, n (%)                                               | 4 (9.3)                  |
| PASI 100, n (%)                                              | 0                        |
| sPGA, n (%) patients with:                                   | N = 43                   |
| 0, n (%)                                                     | 0                        |
| 1, n (%)                                                     | 2 (4.7)                  |
| 2, n (%)                                                     | 12 (27.9)                |
| 3, n (%)                                                     | 26 (60.5)                |
| 4, n (%)                                                     | 3 (7.0)                  |
| 5, n (%)                                                     | 0                        |

*IXE Q2W* ixekizumab every 2 weeks, *IXE Q4W* ixekizumab every 4 weeks, *N* number of patients in the analysis population, *n* number of patients in the specified category, *PASI* Psoriasis Area and Severity Index, *SD* standard deviation, *sPGA* static Physician's Global Assessment



**Supplemental Table S2** Serious adverse events during the long-term extension period (Week 60 to Week 264)

|                                                      |                                   | <b>IXE Q2W/IXE Q4W<sup>a</sup></b> |         |
|------------------------------------------------------|-----------------------------------|------------------------------------|---------|
| <b>Serious Adverse Events</b>                        |                                   | <b>80 mg<br/>604.3 PY</b>          |         |
|                                                      |                                   | <b>n (IR)</b>                      |         |
| Any SAE <sup>b</sup>                                 |                                   | 41 (6.8)                           |         |
| Infections and infestations <sup>c</sup>             | Cellulitis                        | 3 (0.5)                            |         |
|                                                      | Erysipelas                        | 3 (0.5)                            |         |
|                                                      | Pneumonia                         | 3 (0.5)                            |         |
|                                                      | Subcutaneous abscess              | 2 (0.3)                            |         |
|                                                      | Herpes zoster                     | 1 (0.2)                            |         |
|                                                      | Necrotizing fasciitis             | 1 (0.2)                            |         |
|                                                      | Tooth abscess                     | 1 (0.2)                            |         |
|                                                      | Esophageal candidiasis            | 1 (0.2)                            |         |
|                                                      | Nervous system disorders          | Carpal tunnel syndrome             | 1 (0.2) |
|                                                      |                                   | Ischemic stroke                    | 1 (0.2) |
| Presyncope                                           |                                   | 1 (0.2)                            |         |
| Seizure                                              |                                   | 1 (0.2)                            |         |
| Subarachnoid hemorrhage                              |                                   | 1 (0.2)                            |         |
| Musculoskeletal and connective tissue disorders      |                                   | Bursitis                           | 1 (0.2) |
|                                                      | Intervertebral disc protrusion    | 1 (0.2)                            |         |
|                                                      | Osteoarthritis                    | 1 (0.2)                            |         |
| Gastrointestinal disorders                           | Esophageal achalasia              | 2 (0.3)                            |         |
|                                                      | Abdominal pain                    | 1 (0.2)                            |         |
| General disorders and administration site conditions | Chest pain                        | 1 (0.2)                            |         |
|                                                      | Drug withdrawal syndrome          | 1 (0.2)                            |         |
| Injury, poisoning, and procedural complications      | Ankle fracture                    | 1 (0.2)                            |         |
|                                                      | Concussion                        | 1 (0.2)                            |         |
|                                                      | Fall                              | 1 (0.2)                            |         |
|                                                      | Head injury                       | 1 (0.2)                            |         |
|                                                      | Ligament rupture                  | 1 (0.2)                            |         |
|                                                      | Meniscus injury                   | 1 (0.2)                            |         |
| Benign, malignant, and unspecified neoplasms         | Laryngeal squamous cell carcinoma | 1 (0.2)                            |         |
|                                                      | Prostate cancer                   | 1 (0.3) <sup>d</sup>               |         |
|                                                      | Pyogenic granuloma                | 1 (0.2)                            |         |
| Reproductive system and breast disorders             | Endometriosis                     | 1 (0.5) <sup>e</sup>               |         |

|                                        |                            |                      |
|----------------------------------------|----------------------------|----------------------|
|                                        | Ovarian cyst               | 1 (0.5) <sup>e</sup> |
|                                        | Vaginal hemorrhage         | 1 (0.5) <sup>e</sup> |
| Blood and lymphatic system disorders   | Anemia                     | 1 (0.2)              |
| Cardiac disorders                      | Myocardial infarction      | 1 (0.2)              |
|                                        | Myocardial ischemia        | 1 (0.2)              |
|                                        | Palpitations               | 1 (0.2)              |
| Ear and labyrinth disorders            | Positional vertigo         | 1 (0.2)              |
| Psychiatric disorders                  | Anxiety                    | 1 (0.2)              |
|                                        | Depression                 | 1 (0.2)              |
|                                        | Psychotic disorder         | 1 (0.2)              |
|                                        | Schizophrenia              | 1 (0.2)              |
|                                        | Suicide attempt            | 1 (0.2)              |
| Surgical and medical procedures        | Gastrectomy                | 1 (0.2)              |
|                                        | Hernia hiatus repair       | 1 (0.2)              |
| Skin and subcutaneous tissue disorders | Psoriasis                  | 1 (0.2)              |
| Investigations                         | Abnormal electrocardiogram | 1 (0.2)              |
| Vascular disorders                     | Femoral artery aneurism    | 1 (0.2)              |

*IR* incidence rate per 100 patient years, *IXE Q2W* ixekizumab every 2 weeks, *IXE Q4W* ixekizumab every 4 weeks, *n* number of patients in the specified category, *PY* patient years, *SAE* serious adverse event

<sup>a</sup>Patients were allowed to escalate to Q2W dosing after Week 60 during the long-term extension period. Patients who increased dosing to 80 mg IXE Q2W remained on this dose until they completed or discontinued from the study. These data comprise all patients in the approved dosing regimen patient population, including those who escalated to every-2-week dosing during the long-term extension period.

<sup>b</sup>Patients with multiple SAEs were counted once for each category and may have been counted in more than 1 category.

<sup>c</sup>The most frequently reported SAEs were infections and infestations (14 patients; IR: 2.3).

<sup>d</sup>Denominator adjusted for male-specific event: number of males = 140; PY = 392.1.

<sup>e</sup>Denominator adjusted for female-specific event: number of females = 66; PY = 212.1.

**Supplemental Table S3:** List of Ethics Review Boards for Studies UNCOVER-1 and UNCOVER-2

| <b>UNCOVER-2</b>               |                                                                                                                                                                                                                                                                                                                                                                                                                                                                                                                                          |
|--------------------------------|------------------------------------------------------------------------------------------------------------------------------------------------------------------------------------------------------------------------------------------------------------------------------------------------------------------------------------------------------------------------------------------------------------------------------------------------------------------------------------------------------------------------------------------|
| <b>Local Ethics Committees</b> |                                                                                                                                                                                                                                                                                                                                                                                                                                                                                                                                          |
| USA                            | <p>Western Institutional Review Board (WIRB)<br/>1019 39<sup>th</sup> Avenue SE Suite 120<br/>Puyallup, Washington 98374-2115, USA</p> <p>University of Connecticut Institutional Review Board<br/>263 Farmington Ave<br/>Munson Bldg - 2nd Floor,<br/>Farmington, Connecticut 06030-3926, USA</p>                                                                                                                                                                                                                                       |
| Canada                         | <p>Research Review Board, Inc<br/>19-13085 Yonge St Ste 203<br/>Richmond Hill, Ontario L4E 0K2, Canada</p> <p>Research Review Board, Inc<br/>1500-10104 103 Ave NW<br/>Edmonton, Alberta T5J 4A7, Canada</p>                                                                                                                                                                                                                                                                                                                             |
| Germany                        | <p>Ethics Committee of Westphalia-Lippe Medical Association and the Medical Faculty of the WWU Münster<br/>Gartenstr. 210-214, 48147 Münster, Germany</p> <p>Ethikkommission der Medizinischen Hochschule Hannover<br/>Carl-Neuberg-Str. 1<br/>Hannover 30625, Germany</p> <p>Ethics Committee of Hessen State Medical Association<br/>Im Vogelsgesang 3<br/>60488 Frankfurt am Main, Germany</p> <p>Ethikkommission der Medizinischen Fakultät der Eberhard-Karls-Universität Tübingen<br/>Gartenstraße 47 72074, Tübingen, Germany</p> |

|                |                                                                                                                                                                                                                                                                                                                                                                                                                                                                                                                                                                                                                                                                                                                                                                                                                                 |
|----------------|---------------------------------------------------------------------------------------------------------------------------------------------------------------------------------------------------------------------------------------------------------------------------------------------------------------------------------------------------------------------------------------------------------------------------------------------------------------------------------------------------------------------------------------------------------------------------------------------------------------------------------------------------------------------------------------------------------------------------------------------------------------------------------------------------------------------------------|
|                | <p>Ethikkommission der Medizinischen Fakultät der Georg-August-Universität<br/>Göttingen<br/>Von-Siebold-Straße 3 37075, Göttingen, Germany</p> <p>Ethikkommission des Landes Berlin,<br/>Landesamt für Gesundheit und Soziales<br/>Fehrbelliner Platz 1 10707 Berlin, Germany</p> <p>Ethikkommission der Friedrich-Schiller-Universität Jena<br/>Bachstraße 18<br/>7740 Jena, Germany</p> <p>Ethics Committee of the Medical Faculty of Dresden University of Technology<br/>Fetscherstrasse 74<br/>01307, Dresden, Germany</p> <p>Ethikkommission der Medizinischen Fakultät der Universität Duisburg-Essen,<br/>Robert-Koch-Str. 9-11, 45147 Essen, Germany</p> <p>Ethikkommission zur Beurteilung medizinischer Forschung am Menschen der<br/>Aerztekammer Niedersachsen<br/>Berliner Allee 20, 30175 Hannover, Germany</p> |
| United Kingdom | <p>R&amp;D Department Corporate Services Bldg Monklands Hospital, Monkscourt Ave.<br/>ML6 0JS Airdrie, United Kingdom</p> <p>NRES Committee East of England - Cambridge South<br/>R&amp;D Department Salford Royal NHS Foundation Trust<br/>Stott Lane, The Mayo Building, Level 3,<br/>Salford M6 8HD, United Kingdom</p> <p>Medical School Bldg, Royal Free London NHS Foundation Trust<br/>Royal Free Hospital, Pond St, R&amp;D Office, Admin Corridor<br/>Room G649, Medical School Building,<br/>London NW3 2QG, United Kingdom</p> <p>R&amp;D Management Office Western Infirmary, Tennent Institute, 1st Floor, 38 Church<br/>St, Glasgow G11 6NT, United Kingdom</p>                                                                                                                                                   |

|           |                                                                                                                                                                                                                                                                                                                                                                                                                                                                                                                                                           |
|-----------|-----------------------------------------------------------------------------------------------------------------------------------------------------------------------------------------------------------------------------------------------------------------------------------------------------------------------------------------------------------------------------------------------------------------------------------------------------------------------------------------------------------------------------------------------------------|
|           | <p>Tayside Medical Science Centre, Ninewells Hospital &amp; Medical School<br/>TASC Research &amp; Development Office, Residency Block, Level 3, George Pirie Way, Dundee, DD1 9SY, United Kingdom</p> <p>Research &amp; Development Dept, Northern Lincolnshire and Goole Hospitals NHS Foundation Trust, Scunthorpe General Hospital, Cliff Gardens<br/>Scunthorpe, North Lincolnshire, DN15 7BH, United Kingdom</p> <p>Sheffield Teaching Hospital NHS Foundation Trust, Glossop Rd, Royal Hallamshire Hospital, Sheffield S10 2JF, United Kingdom</p> |
| Australia | <p>Eastern Health Research and Ethics Sub-Committee<br/>5 Arnold St, Box Hill<br/>Victoria 3128, Australia</p> <p>Cabrini Human Research Ethics Committee<br/>183 Wattletree Rd<br/>Malvern East, Victoria 3145, Australia</p> <p>Human Research Ethics Committee of North Sydney Central Coast Health,<br/>Level 13 Kolling Bldg, Royal North Shore Hospital<br/>St Leonards New South Wales 2065, Australia</p>                                                                                                                                         |
| Austria   | <p>Ethics Committee<br/>Vienna Medical University<br/>Borschkegasse 8b/6<br/>1090 Vienna, Austria</p> <p>Ethikkommission des Landes Vorarlberg<br/>Rathausstrasse 15<br/>6900 Bregenz, Austria</p> <p>Ethics Committee of Innsbruck Medical University<br/>Innrain 43<br/>6020 Innsbruck, Austria</p>                                                                                                                                                                                                                                                     |

|                |                                                                                                                                                                                                                                                                                                                                                                                                                                                                                                                                                                                                                                                                                                                                                                                                                                                                                                          |
|----------------|----------------------------------------------------------------------------------------------------------------------------------------------------------------------------------------------------------------------------------------------------------------------------------------------------------------------------------------------------------------------------------------------------------------------------------------------------------------------------------------------------------------------------------------------------------------------------------------------------------------------------------------------------------------------------------------------------------------------------------------------------------------------------------------------------------------------------------------------------------------------------------------------------------|
| Czech Republic | <p>Etická komise Fakultní nemocnice u sv. Anny v Brně<br/>Pekarska 53<br/>656 91 Brno, Czech Republic</p> <p>Etická komise pro multicentrické klinické hodnocení<br/>Fakultní nemocnice v Motole<br/>V Uvalu 84<br/>150 06 Praha 5 -Motol, Czech Republic</p>                                                                                                                                                                                                                                                                                                                                                                                                                                                                                                                                                                                                                                            |
| Spain          | <p>Comité Ético de Investigación Clínica Hospital Universitari Germans Trias i Pujol</p> <p>Secretaría del CEIC –<br/>Planta baja, pasillo de archivo<br/>Edificio Materno-Infantil<br/>Ctra. del Canyet, s/n<br/>08916 Badalona – Barcelona, Spain</p> <p>Comité Ético de Investigación Clínica – Área 7<br/>Hospital Clínico San Carlos<br/>Servicio de Farmacología Clínica<br/>Unidad de Coordinación de Ensayos Clínicos<br/>1.ª planta, Ala norte, puerta G<br/>28040 Madrid, Spain</p> <p>Comité Ético de Investigación Clínica<br/>Hospital de la Santa Creu i Sant Pau<br/>Servicio de Farmacología Clínica<br/>Edificio HC, planta 1ª - izquierda.<br/>Av. Sant Antoni Mª Claret, 167<br/>08025 Barcelona, Spain</p> <p>Comité Coordinador de Ética de la Investigación Biomédica de Andalucía<br/>Avda. Innovación, s/n<br/>Consejería de Salud Edificio Arena I<br/>Sevilla 41020, Spain</p> |

|  |                                                                                                                                                                                                                                                                                                                                                                                                                                                                                                                                                                                                                                                                                                                                                                                                                                                                                                                                                                                                                                                                                                                                               |
|--|-----------------------------------------------------------------------------------------------------------------------------------------------------------------------------------------------------------------------------------------------------------------------------------------------------------------------------------------------------------------------------------------------------------------------------------------------------------------------------------------------------------------------------------------------------------------------------------------------------------------------------------------------------------------------------------------------------------------------------------------------------------------------------------------------------------------------------------------------------------------------------------------------------------------------------------------------------------------------------------------------------------------------------------------------------------------------------------------------------------------------------------------------|
|  | <p>Comité Ético de Investigación Clínica - Área 8<br/> Fundación Hospital Alcorcón<br/> C/ Budapest, nº1 - Planta Sótano<br/> 28922 Alcorcón – Madrid, Spain</p>                                                                                                                                                                                                                                                                                                                                                                                                                                                                                                                                                                                                                                                                                                                                                                                                                                                                                                                                                                              |
|  | <p>Comité Ético de Investigación Clínica<br/> Hospital General Universitario de Alicante<br/> Centro de Diagnósticos - 3ª Plta. - Edificio Gris<br/> C/ Pintor Baeza, 12<br/> 03010 Alicante, Spain</p> <p>Comité Ético de Investigación Clínica<br/> Parc de Salut MAR<br/> Consorci Mar Parc de Salut de Barcelona<br/> Parc de Recerca Biomèdica de Barcelona (dcho. 163.03)<br/> C/ Doctor Aiguader, 88, 1ª planta<br/> 08003 Barcelona, Spain</p> <p>Hospital Universitario 12 De Octubre Instituto De Investigacion Hospital 12 de Octubre (i+12)<br/> Avda. de Cordoba s/n<br/> Area de Gestion de Proyectos - Unidad Administrativa CEIC<br/> Centro de Actividades Ambulatorias, Bloque D - Planta 6ª<br/> 28041 Madrid, Spain</p> <p>Comité Ético de Investigación Clínica<br/> Hospital Univ. de Gran Canaria Dr. Negrín<br/> 1.º Planta-Al lado de Farmacia<br/> C/ Barranco de la Ballena, s/n<br/> 35010 Las Palmas de Gran Canaria, Spain</p> <p>Comité Coordinador de Ética de la Investigación Biomédica de Andalucía<br/> Avda. Innovación, s/n<br/> Consejería de Salud<br/> Edificio Arena I<br/> Sevilla 41020 Spain</p> |

| <b>Central Ethics Committees</b> |                                                                                                                                                                      |
|----------------------------------|----------------------------------------------------------------------------------------------------------------------------------------------------------------------|
| USA                              | Schulman Associates IRB<br>4445 Lake Forest Dr, Ste 300<br>Cincinnati, Ohio 45242, USA*                                                                              |
| Germany                          | Ethikkommission der Ärztekammer Hamburg<br>Weidestr. 122 b<br>22083 Hamburg, Germany                                                                                 |
| Poland                           | Komisja Bioetyczna przy Centralnym Szpitalu Klinicznym MSW<br>Ul. Wołoska 137<br>02-507 Warszawa, Mazowieckie, Poland                                                |
| Romania                          | Academy of Medical Sciences National Bioethics Committee of Medicines and Medical Devices<br>020125 Bucharest<br>19-21 Stefan Cel Mare Street<br>District 2, Romania |
| United Kingdom                   | NRES Committee East of England - Cambridge South<br>The Old Chapel, Royal Standard Ct<br>Nottingham NG1 6FS, United Kingdom                                          |
| Australia                        | Bellberry Human Research Ethics Committee (HREC)<br>129 Glen Osmond Rd<br>Eastwood, South Australia 5063, Australia                                                  |
| France                           | CPP ile de france IV<br>Hôpital Saint Louis,<br>Porte 5 du carre Historique<br>1 Avenue Claude Vellefaux<br>75475 Paris Cedex 10, France                             |
| Netherlands                      | CMO Regio Arnhem-Nijmegen<br>UMC St Radboud Centraal,<br>route 578<br>Geert Grooteplein 10<br>6500 HB Nijmegen, Netherlands                                          |



|                |                                                                                                                                                                                                                                                                                                                     |
|----------------|---------------------------------------------------------------------------------------------------------------------------------------------------------------------------------------------------------------------------------------------------------------------------------------------------------------------|
| Poland         | Komisja Bioetyczna przy Centralnym Szpitalu Klinicznym MSW<br>ul. Wołoska 137<br>02-507 Warszawa, Mazowieckie, Poland                                                                                                                                                                                               |
| Austria        | Ethics Committee Graz Medical University<br>Auenbruggerplatz 2<br>8036 Graz, Austria                                                                                                                                                                                                                                |
| Czech Republic | Etická komise Fakultní nemocnice Kralovské Vinohrady<br>Srobarova 50<br>100 34 Praha 10, Czech Republic                                                                                                                                                                                                             |
| Spain          | Comité Ético de Investigación Clínica Hospital Universitari Germans Trias i Pujol<br><br>Secretaría del CEIC –<br>Planta baja, pasillo de archivo<br>Edificio Materno-Infantil<br>Ctra. del Canyet, s/n<br>08916 Badalona – Barcelona, Spain                                                                        |
|                | Comité Ético de Investigación Clínica<br>Area de Gestion de Proyectos –<br>Unidad Administrativa<br>Hospital Universitario 12 de Octubre<br>Instituto de Investigación Hospital 12 de Octubre (i+12)<br>Centro de Actividades Ambulatorias,<br>6ª Planta – Bloque D<br>Avda. de Córdoba, s/n<br>28041 Madrid, Spain |

*IRB* institutional review board, *USA* United States of America
